# Supplementary material
Source: PubMed Central journal article supplement (PMC6075573)

Figure S1a

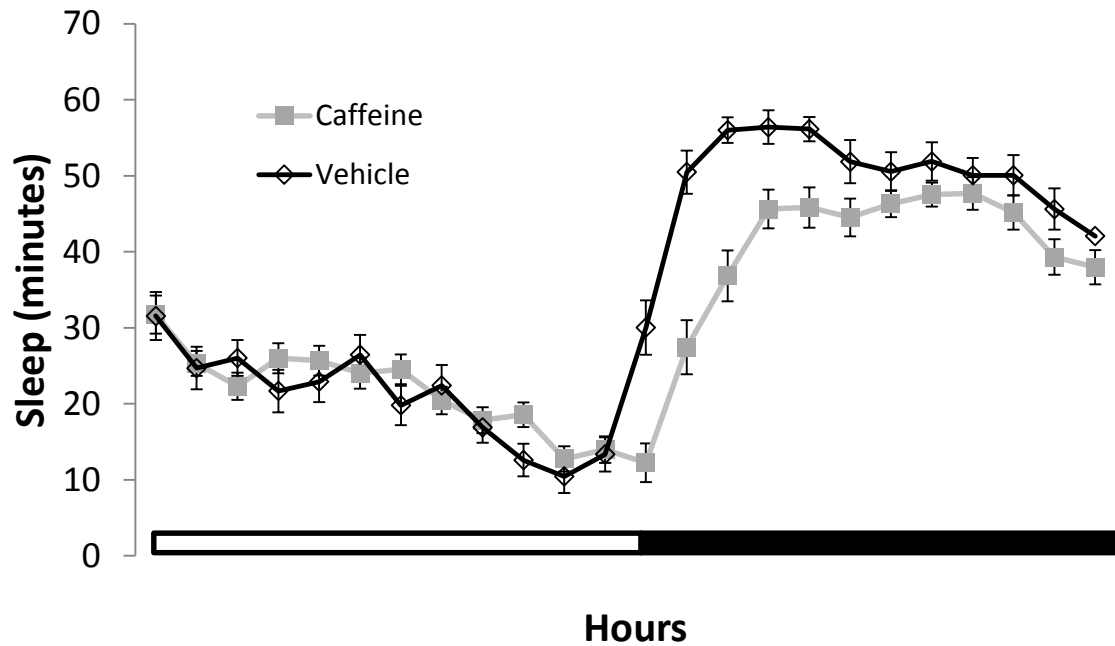

Figure S1b

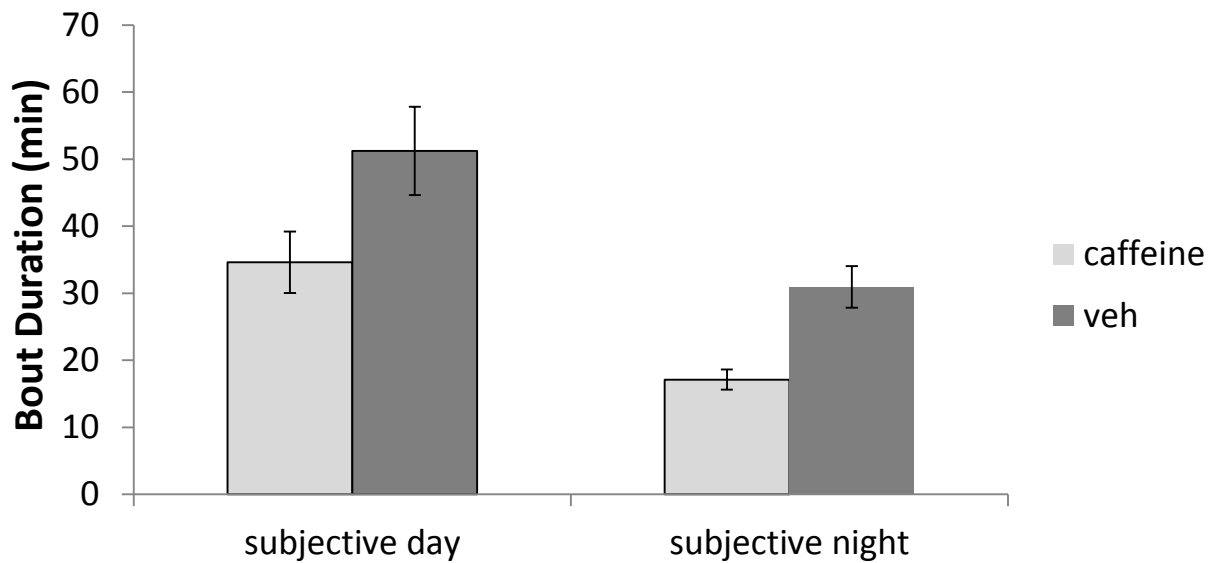

Supplement: zsx095_suppl_fig_s1_supplemental_figures.pdf [file zsx095_suppl_fig_s1_supplemental_figures.pdf]
